# Supplementary material for: Hydroxy-β-sanshool isolated from Zanthoxylum piperitum (Japanese pepper) shortens the period of the circadian clock
Source: Royal Society of Chemistry journal article supplement (doi:10.1039/d2fo01036d), 2022-01-01
Supplement: d2fo01036d2.pdf [file d2fo01036d2.pdf]

1 **Supplementary data**

2

3 **Supplementary Figure S1. LC-low resolution-MS analyses of compound (I).**

4

5 (A) Liquid chromatography-MS-TOF findings in total positive ion mode (upper) and UV absorbance  
6 at 254 nm (lower) of purified compound I. (B) Average mass spectrum from 12.939 to 13.489 min in  
7 chromatogram shown in (A). (C) LC-MS-TOF findings in total negative ion mode (upper) and UV  
8 absorbance at 254 nm (lower) of purified compound I. (D) Average mass spectrum from 13.222 to  
9 13.603 in chromatogram shown in (C). These results were obtained before those shown in Figure 4.  
10 These findings confirmed that peaks in compound I can be detected in positive and negative modes  
11 and that the range of mass references for precise mass determination is 20–1,000.

12

13 **Supplementary Figure S2. Replotted data of *Per2* and *Bmal1* oscillation in A9 cells.**

14 Data shown in Figure 6 plotted against time show oscillation profiles of *Per2* and *Bmal1* genes in A9  
15 cells incubated without (control, ethanol; A) and with (B) hydroxy- $\beta$ -sanshool (9  $\mu\text{g}/\text{mL}$ ).

16

17 **Supplementary Figure S3. Comparison of effects of hydroxy- $\alpha$ -sanshool and hydroxy- $\beta$ -  
18 sanshool on circadian rhythmicity.**

19 A9 cells harbouring *Bmal1*-SLR and *Per2*-Eluc promoter-reporters were incubated with various  
20 concentrations of authentic hydroxy- $\alpha$ -sanshool and hydroxy- $\beta$ -sanshool, then period lengths of  
21 both genes were determined at each concentration. (A) and (B) respectively summarize the period  
22 lengths of *Per2* and *Bmal1*. Period was shortened by hydroxy- $\beta$ -sanshool, but not hydroxy- $\alpha$ -  
23 sanshool. C, control (ethanol); A2, and A10, hydroxy- $\alpha$ -sanshool 2 and 10  $\mu\text{g}/\text{mL}$ , respectively;  
24 B2 and B10, hydroxy- $\beta$ -sanshool 2 and 10  $\mu\text{g}/\text{mL}$ , respectively.
