# Supplementary figures and images for: Hydroxy-β-sanshool isolated from Zanthoxylum piperitum (Japanese pepper) shortens the period of the circadian clock
Source: Royal Society of Chemistry journal article supplement (doi:10.1039/d2fo01036d), 2022-01-01

(A)

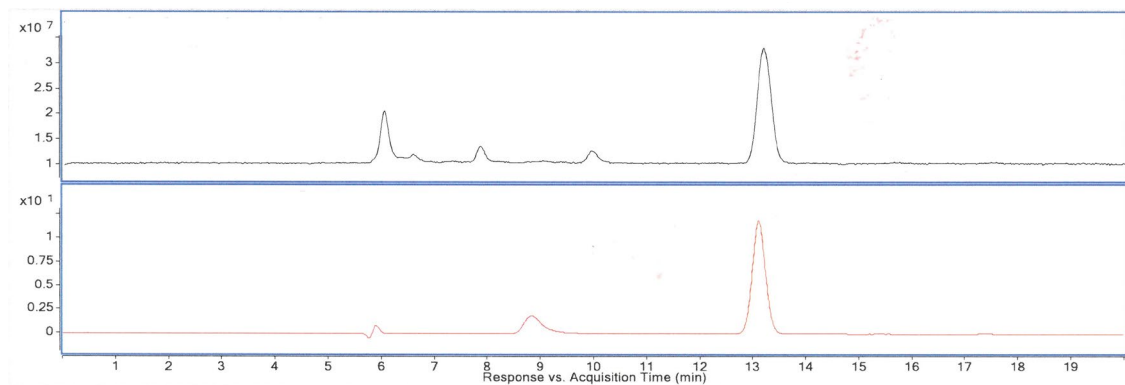

(C)

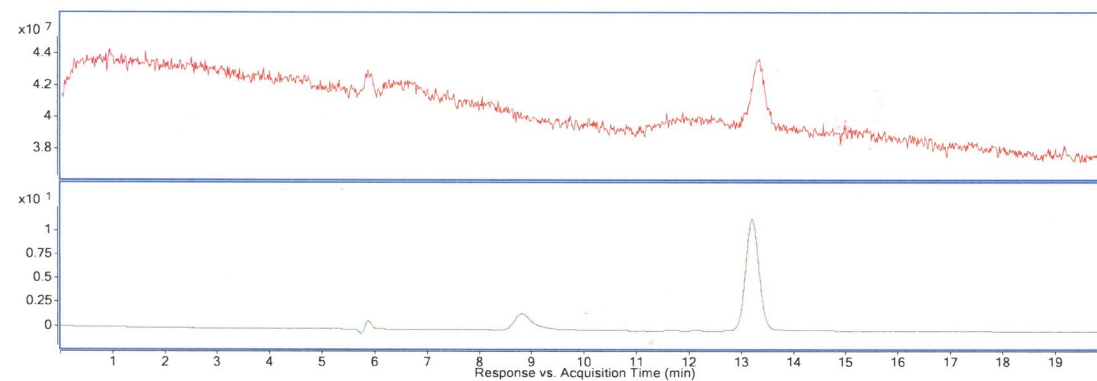

(B)

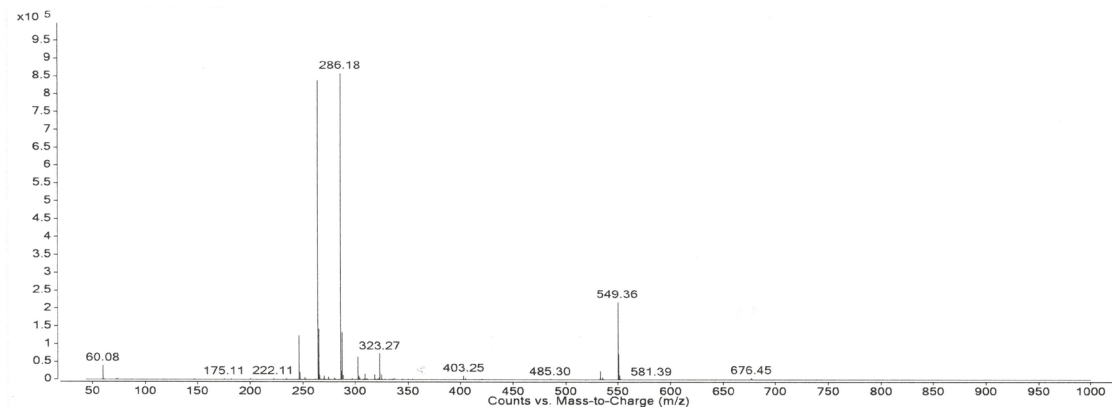

(D)

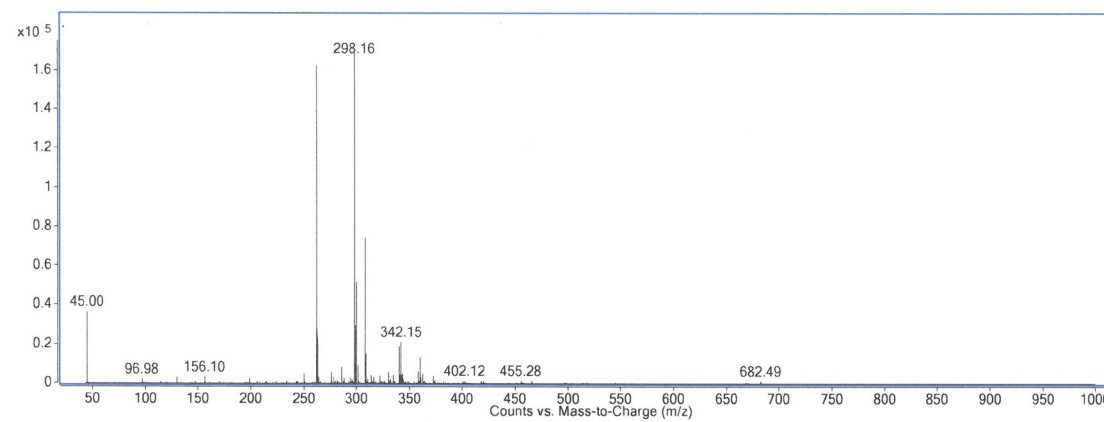

Figure S1

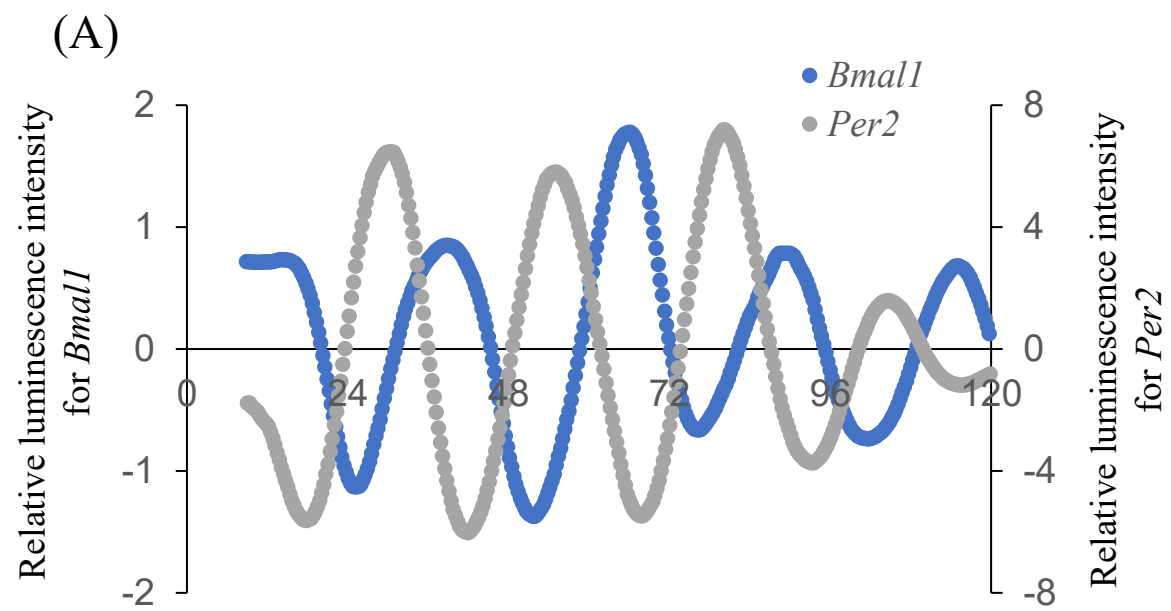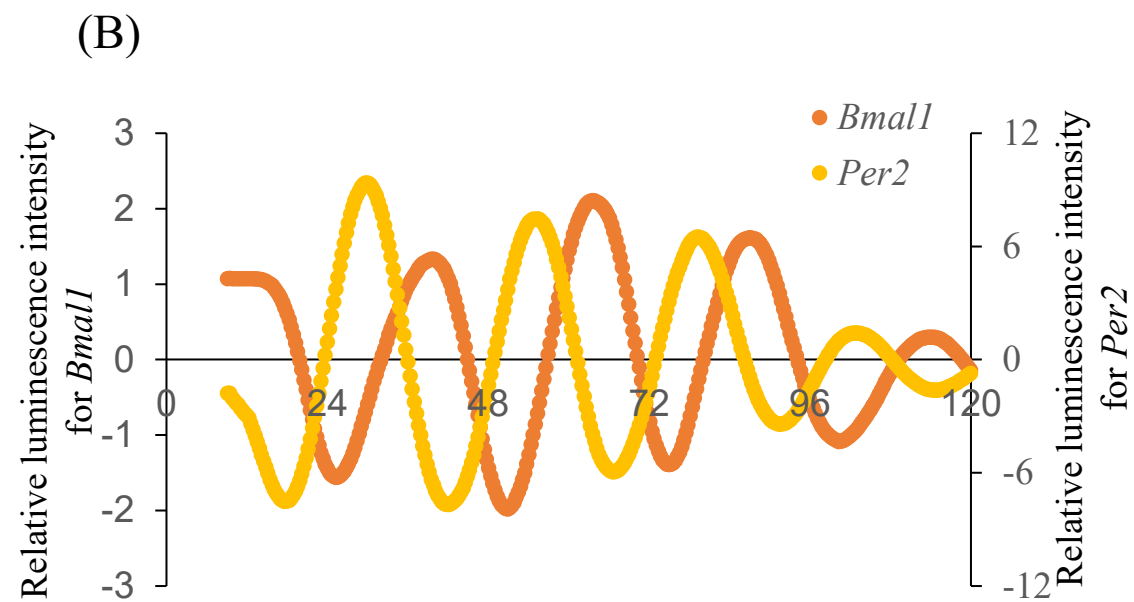

Figure S2

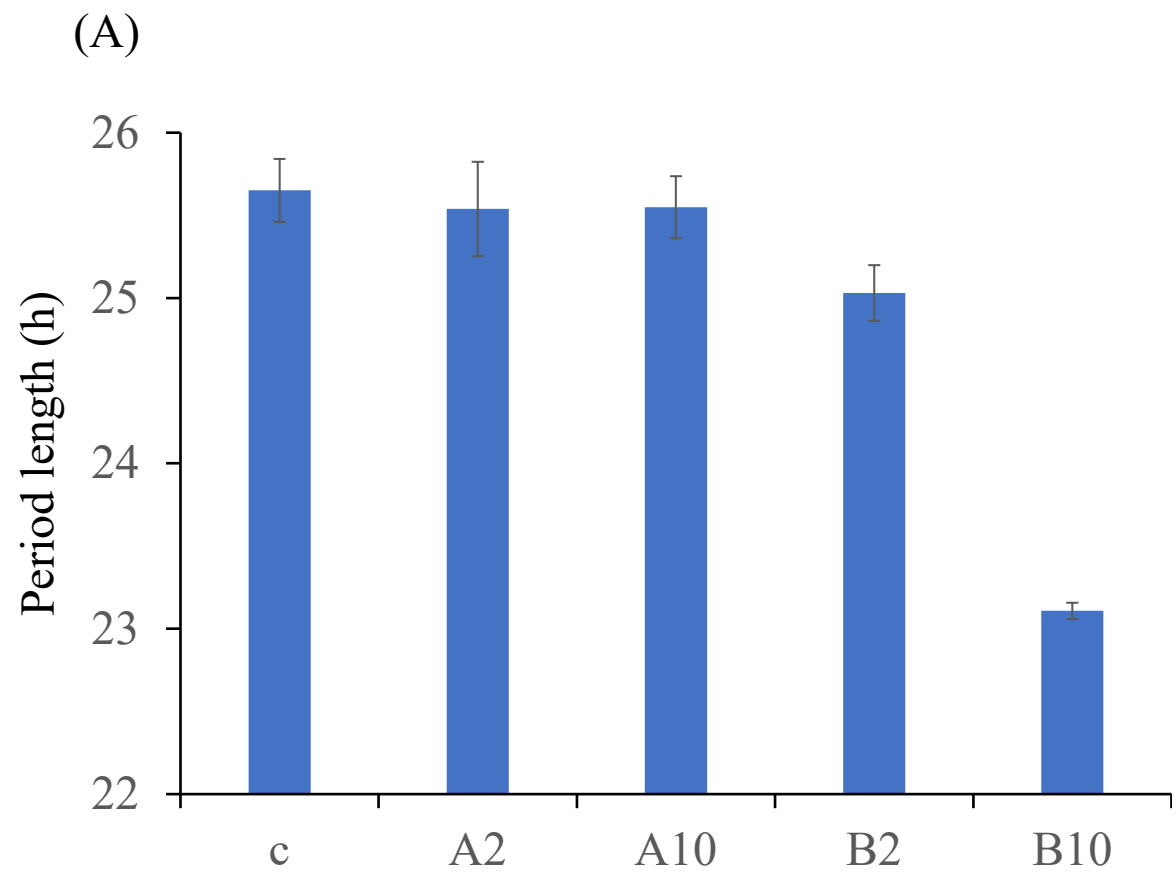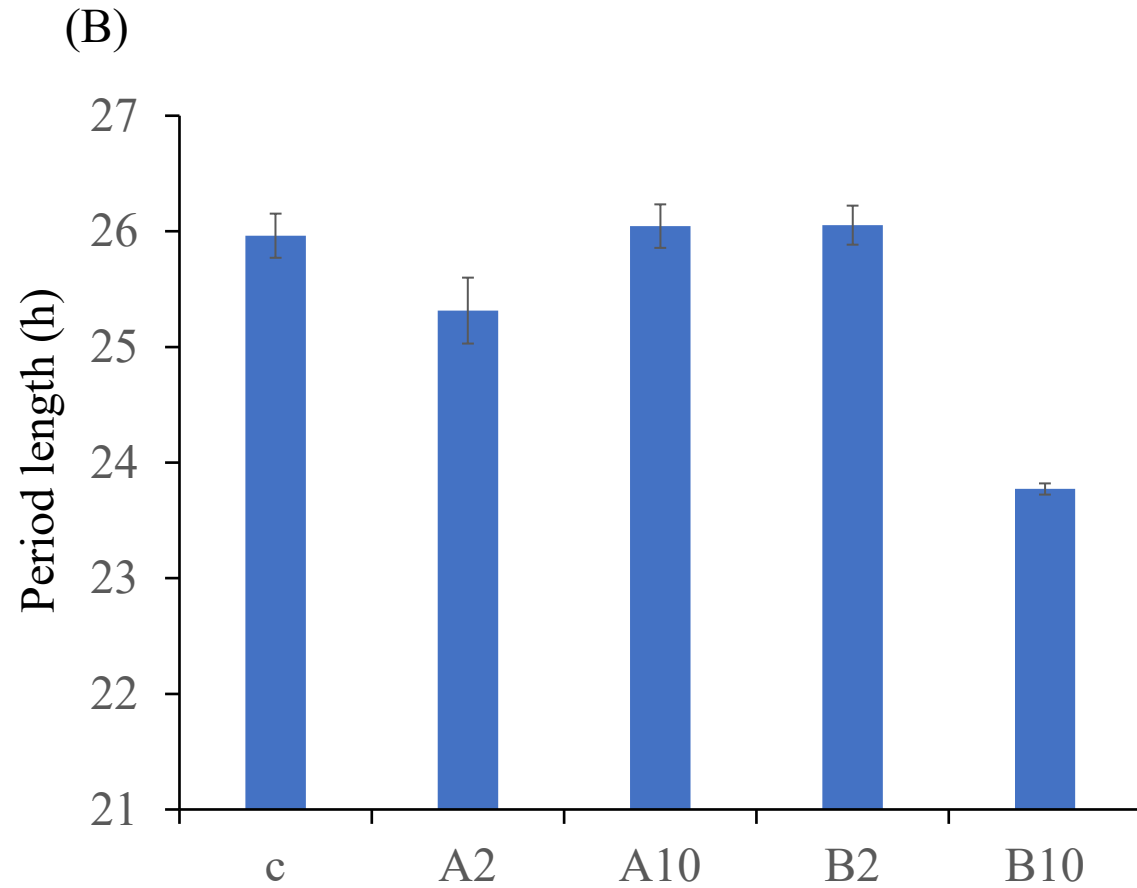

Figure S3

Supplement: d2fo01036d1.pdf [file d2fo01036d1.pdf]
